# Supplementary material for: Modeling luminal breast cancer heterogeneity: combination therapy to suppress a hormone receptor-negative, cytokeratin 5-positive subpopulation in luminal disease
Source: PubMed Central journal article supplement (PMC4187339; doi:10.1186/s13058-014-0418-6), 2014-08-13
Supplement: 13058_2014_418_MOESM1_ESM.pdf [file 13058_2014_418_MOESM1_ESM.pdf]

**Additional File 1: Table S1. Antibodies**

| <b>Antibody</b>             | <b>Application</b> | <b>Dilution</b> | <b>Source</b>         |
|-----------------------------|--------------------|-----------------|-----------------------|
| Annexin A1                  | IHC                | 1:100           | Millipore             |
| BrdU                        | IHC                | 1:50            | Becton-Dickinson      |
| CD44                        | IHC                | 1:200           | Neomarkers/Thermo Sci |
| CD49f                       | IHC                | 1:100           | Millipore             |
| CD49f PE-Cy5                | FC                 | –               | BD Pharmingen         |
| CK8/18                      | IHC                | 1:100           | Leica Microsystems    |
| CK5                         | IHC                | 1:200           | Abcam                 |
| CK5                         | IHC, FC            | 1:100           | Leica Microsystems    |
| Claudin-3                   | IHC                | 1:200           | Abcam                 |
| Claudin-3 FITC              | FC                 | –               | R&D Systems           |
| EGFR                        | IHC                | 1:400           | Millipore             |
| EGFR-PE                     | FC                 | –               | BioLegend             |
| ER (Clone 1D5)              | IHC                | 1:50            | Dako                  |
| ER $\alpha$ (SP1)           | IHC                | 1:100           | Labvision             |
| FOXA1                       | IHC                | 1:500           | Abcam                 |
| GATA3                       | IHC                | 1:100           | Santa Cruz Biotech    |
| Jag1                        | IHC                | 1:100           | Santa Cruz Biotech    |
| Muc1                        | IHC                | 1:100           | Santa Cruz Biotech    |
| Notch-1                     | IHC                | 1:100           | Cell Signaling        |
| Notch-1 APC                 | FC                 | –               | BioLegend             |
| P-Cadherin                  | IHC                | 1:100           | R&D Systems           |
| PR (SP2)                    | IHC                | 1:100           | LabVision             |
| PR (Clone 1294)             | IHC                | 1:500           | Dako                  |
| P63                         | IHC                | 1:50            | Epitomics             |
| Slug                        | IHC                | 1:50            | Cell Signaling        |
| <b>Secondary Antibodies</b> |                    |                 |                       |
| Goat anti rabbit 488        | IHC                | 1:200           | Invitrogen            |
| Goat anti-rabbit 555        | IHC                | 1:200           | Invitrogen            |
| Goat anti-mouse 488         | IHC                | 1:400           | Invitrogen            |
| Goat anti-mouse 555         | IHC                | 1:200           | Invitrogen            |

IHC: Immunohistochemistry, FC: Flow Cytometry
