# Supplementary material for: Modeling luminal breast cancer heterogeneity: combination therapy to suppress a hormone receptor-negative, cytokeratin 5-positive subpopulation in luminal disease
Source: PubMed Central journal article supplement (PMC4187339; doi:10.1186/s13058-014-0418-6), 2014-08-13
Supplement: 13058_2014_418_MOESM2_ESM.pdf [file 13058_2014_418_MOESM2_ESM.pdf]

**Additional File 2: Table S2. 89 NCI-DTP Approved Oncology Library Screen of Luminobasal Cells**

| <b>Drug Name</b>     | <b>% LB (-E<sub>2</sub>)</b> | <b>% LB (+E<sub>2</sub>)</b> | <b>Drug Name</b>    | <b>% LB (-E<sub>2</sub>)</b> | <b>% LB (+E<sub>2</sub>)</b> |
|----------------------|------------------------------|------------------------------|---------------------|------------------------------|------------------------------|
| Acrichine            | 42.94                        | 41.59                        | Ixabepilone         | 26.17                        | 20.80                        |
| Adriamycin           | 29.79                        | 28.71                        | Lapatinib           | 46.21                        | 41.53                        |
| Allopurinol          | 46.30                        | 43.94                        | Lenalidomide        | 46.44                        | 38.83                        |
| Altretamine          | 43.69                        | 44.91                        | Letrozole           | 47.72                        | 42.97                        |
| Amifostine           | 45.22                        | 40.20                        | Lomustine           | 46.14                        | 44.19                        |
| Aminolevulinic acid  | 45.86                        | 42.75                        | Megestrol acetate   | 44.94                        | 37.22                        |
| Anastrozole          | 45.41                        | 44.15                        | Melphalan           | 40.57                        | 35.72                        |
| Arsenic trioxide     | 42.88                        | 40.80                        | Mercaptopurine      | 50.92                        | 44.03                        |
| Azacitidine          | 49.27                        | 44.39                        | Methotrexate        | 37.63                        | 33.79                        |
| Bleomycin            | 35.81                        | 31.52                        | Methoxsalen         | 43.55                        | 43.85                        |
| Bortezomib           | 45.71                        | 7.00                         | Mithramycin         | 5.28                         | 6.97                         |
| Busulfan             | 44.90                        | 39.17                        | Mitomycin C         | 40.59                        | 40.18                        |
| Capecitabine         | 45.55                        | 37.25                        | Mitotane            | 43.18                        | 40.89                        |
| Carboplatin          | 44.06                        | 40.30                        | Mitoxantrone        | 34.07                        | 38.28                        |
| Carmustine           | 44.17                        | 43.10                        | Nelarabine          | 41.43                        | 37.44                        |
| Celecoxib            | 45.92                        | 40.94                        | Nilotinib           | 50.90                        | 51.15                        |
| Chlorambucil         | 43.24                        | 42.85                        | Nitrogen mustard    | 40.34                        | 35.27                        |
| Cisplatin            | 44.05                        | 42.87                        | Oxaliplatin         | 40.38                        | 42.55                        |
| Cladribine           | 38.01                        | 36.31                        | paclitaxel          | 34.26                        | 29.92                        |
| Clofarabine          | 37.73                        | 35.55                        | Pemetrexed          | 37.42                        | 37.01                        |
| Cyclophosphamide     | 43.22                        | 46.10                        | Pentostatin         | 44.48                        | 36.85                        |
| Cytosine arabinoside | 31.14                        | 34.16                        | Pipobroman          | 44.80                        | 48.46                        |
| Dacarbazine          | 46.36                        | 42.39                        | Procarbazine        | 42.54                        | 42.19                        |
| Dactinomycin         | 5.72                         | 6.50                         | Raloxifene          | 44.07                        | 39.93                        |
| Dasatinib            | 44.10                        | 46.28                        | Rapamycin           | 46.98                        | 39.63                        |
| Daunorubicin         | 20.56                        | 21.92                        | Sorafenib           | 44.09                        | 34.63                        |
| Decitabine           | 42.93                        | 35.84                        | Streptozocin        | 43.36                        | 40.66                        |
| Dexrazoxone          | 42.74                        | 40.71                        | Sunitinib           | 48.18                        | 41.85                        |
| Docetaxel            | 24.90                        | 19.39                        | Tamoxifen           | 42.73                        | 36.54                        |
| <b>Erlotinib</b>     | 10.25                        | 7.10                         | Temozolomide        | 44.95                        | 29.99                        |
| Estramustine         | 45.11                        | 39.73                        | Teniposide          | 34.86                        | 33.97                        |
| Etoposide            | 35.37                        | 34.11                        | Thalidomide         | 44.66                        | 40.83                        |
| Everolimus           | 47.35                        | 43.49                        | Thioguanine         | 48.82                        | 41.49                        |
| Exemestane           | 42.94                        | 40.42                        | Thiotepa            | 40.41                        | 34.53                        |
| Floxuridine          | 36.22                        | 38.17                        | Topotecan           | 28.09                        | 28.75                        |
| Fludarabine          | 44.53                        | 39.46                        | Tretinoin           | 40.63                        | 41.61                        |
| Fluorouracil         | 44.76                        | 42.78                        | Triethylenemelamine | 42.68                        | 39.16                        |
| Fulvestrant          | 45.10                        | 40.75                        | Uracil mustard      | 41.44                        | 36.81                        |
| <b>Gefitinib</b>     | 9.24                         | 8.98                         | Valrubicin          | 37.63                        | 32.85                        |
| Gemcitabine          | 34.18                        | 34.66                        | Vinblastine         | 42.14                        | 50.26                        |
| Hydroxyurea          | 48.09                        | 41.09                        | Vincristine         | 38.75                        | 45.12                        |
| Ifosfamide           | 42.81                        | 39.50                        | Vinorelbine         | 40.44                        | 47.61                        |
| Imatinib             | 43.67                        | 42.07                        | Vorinostat          | 47.32                        | 38.78                        |
| Imiquimod            | 45.68                        | 39.20                        | Zoledronic acid     | 46.95                        | 44.63                        |
| Irinotecan           | 43.33                        | 39.20                        | <b>Vehicle</b>      | 45.04                        | 39.51                        |
