# Supplementary material for: Modeling luminal breast cancer heterogeneity: combination therapy to suppress a hormone receptor-negative, cytokeratin 5-positive subpopulation in luminal disease
Source: PubMed Central journal article supplement (PMC4187339; doi:10.1186/s13058-014-0418-6), 2014-08-13
Supplement: 13058_2014_418_MOESM3_ESM.pdf [file 13058_2014_418_MOESM3_ESM.pdf]

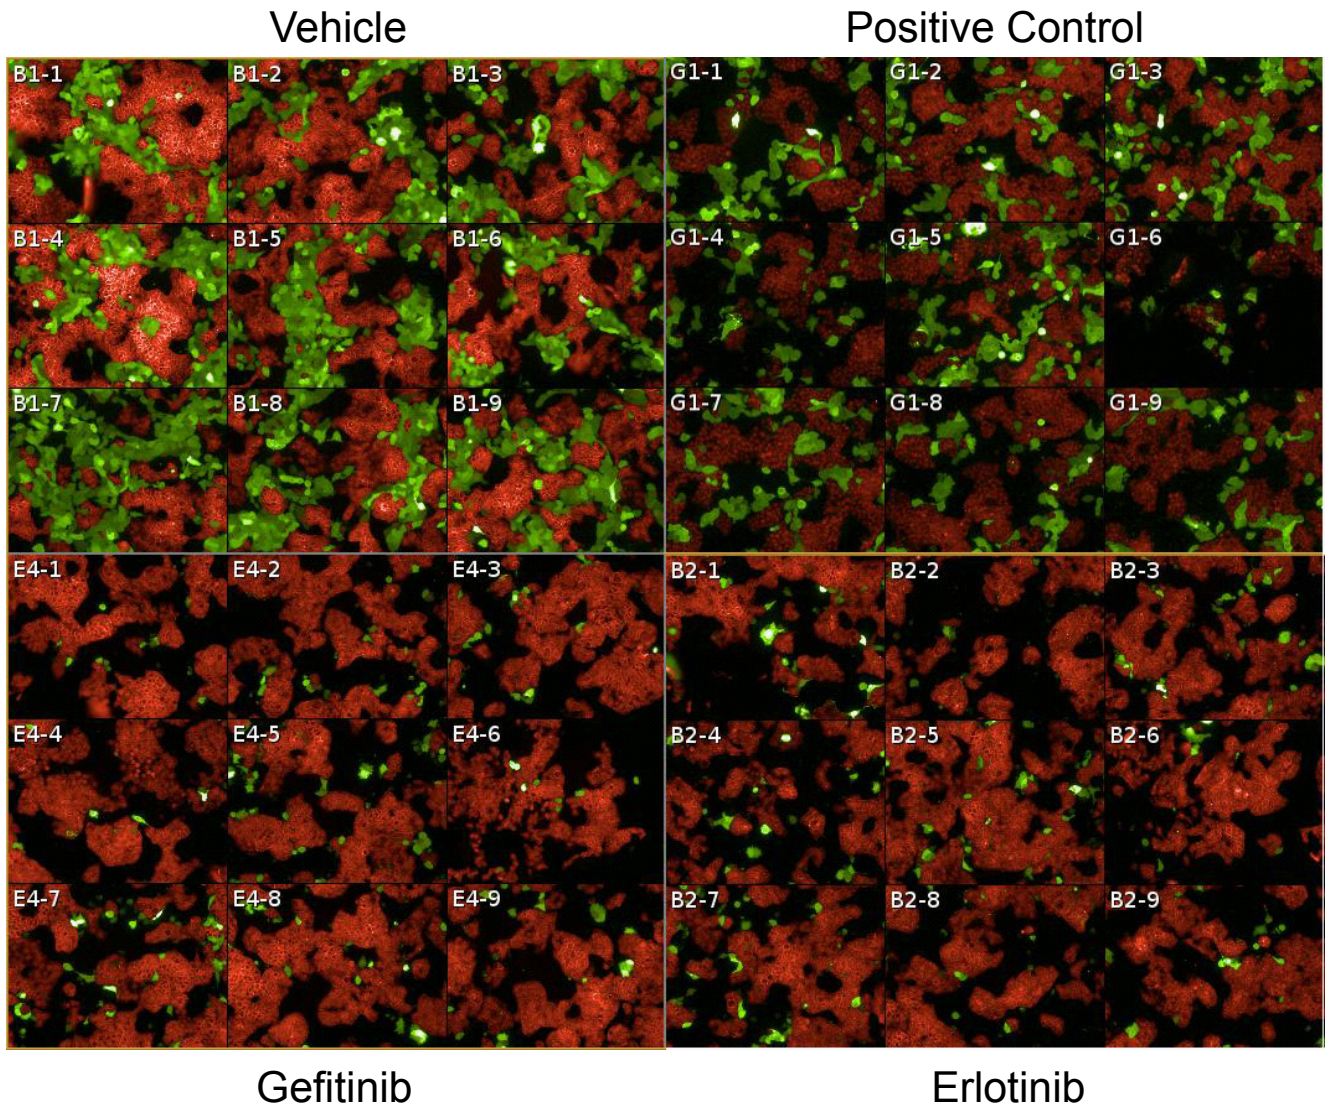

Figure S1. Luminal (Red) and Luminobasal (Green) coculture assay for luminobasal specific therapies. Top: Representative images from single wells of negative (vehicle) and positive (reduced luminobasal plating density) controls. Bottom: Representative images of wells treated with EGFR inhibitors Gefitinib and Erlotinib (1 $\mu$ M).
