# Supplementary material for: Modeling luminal breast cancer heterogeneity: combination therapy to suppress a hormone receptor-negative, cytokeratin 5-positive subpopulation in luminal disease
Source: PubMed Central journal article supplement (PMC4187339; doi:10.1186/s13058-014-0418-6), 2014-08-13
Supplement: 13058_2014_418_MOESM6_ESM.pdf [file 13058_2014_418_MOESM6_ESM.pdf]

A

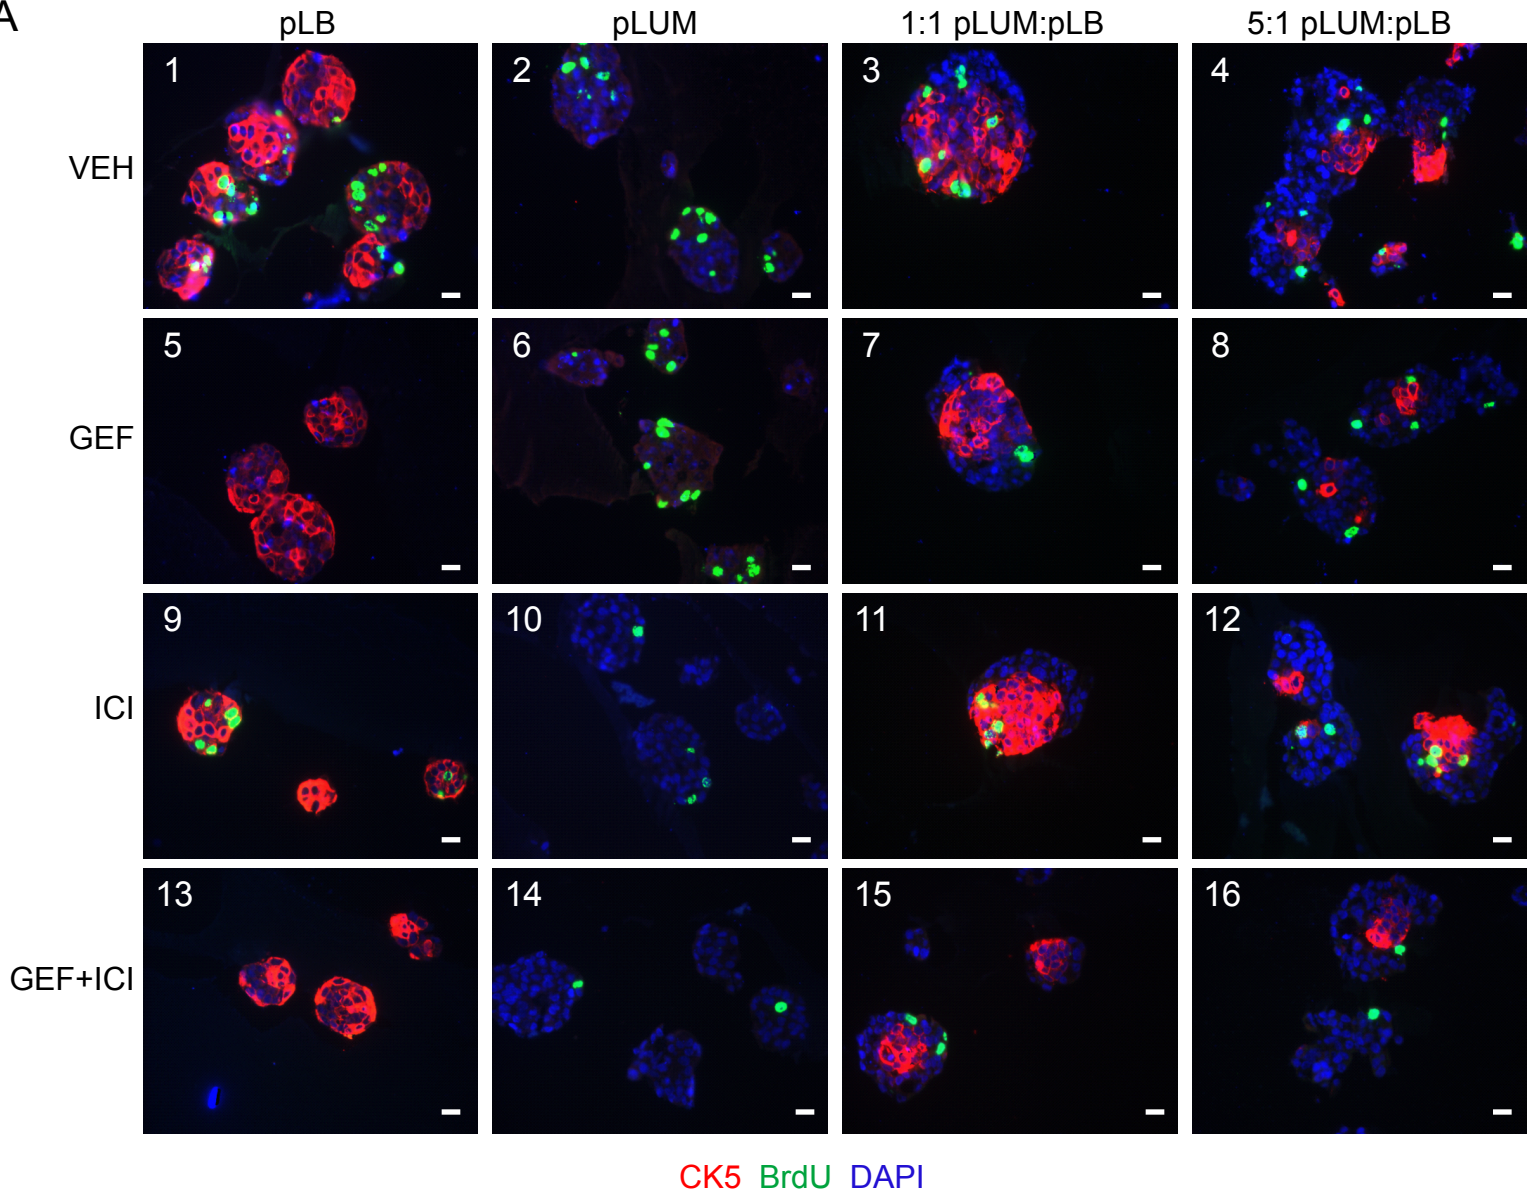

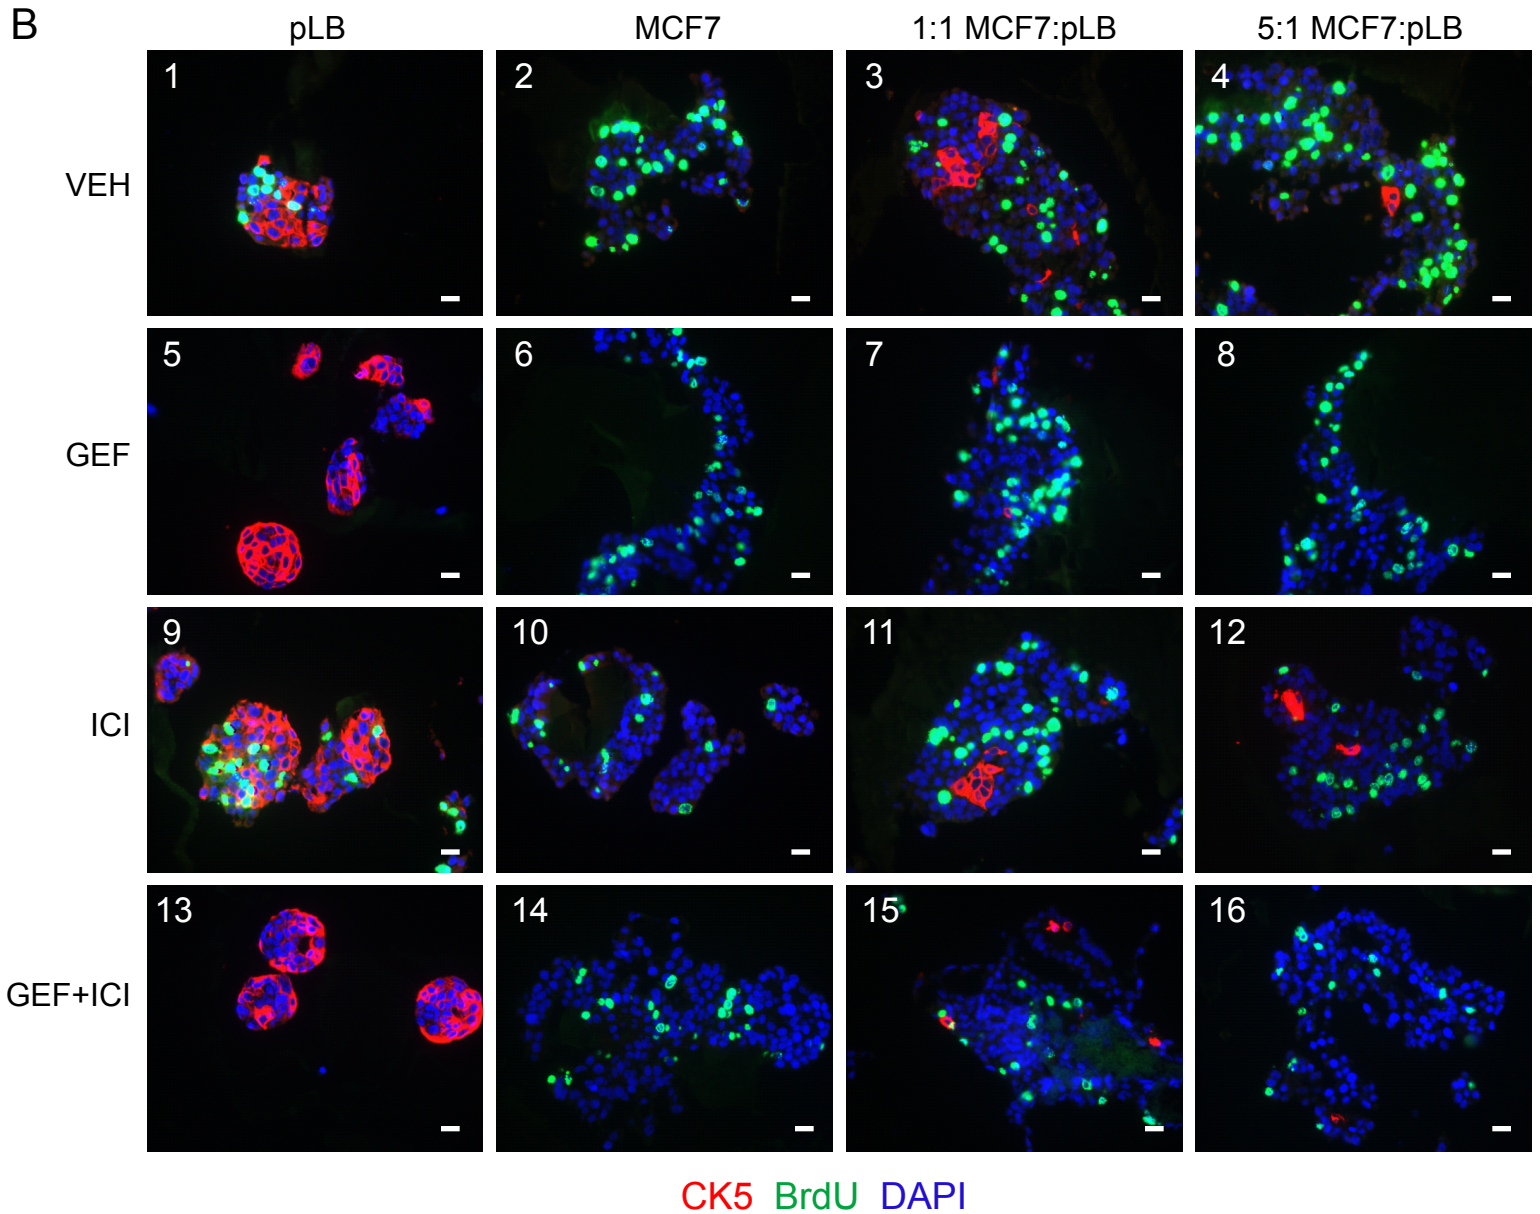

Figure S4. Combined targeting of luminal and luminobasal cells with antiestrogen/gefitinib treatment of mixed-cell tumor models. Representative images of 3D tumor models (**A**; LUM:LB, **B**; MCF7:LB) under control, ICI and/or Gefitinib treatment. Scale bars equal 20 $\mu$ M.
